# Supplementary material for: Mapping Three Decades of Changes in the Tropical Andean Glaciers Using Landsat Data Processed in the Earth Engine
Source: MDPI journal article supplement (doi:10.3390/rs14091974), 2022-04-20
Supplement: s1 [file s1]

## Article

# Mapping Three Decades of Changes in the Tropical Andean Glaciers Using Landsat Data Processed in the Earth Engine

Efrain Yury Turpo Cayo <sup>1,2,\*</sup>, Maria Olga Borja <sup>3</sup>, Raul Espinoza-Villar <sup>2</sup>, Nicole Moreno <sup>1</sup>, Rodney Camargo <sup>4</sup>, Claudia Almeida <sup>2,5</sup>, Kathrin Hopfgartner <sup>1</sup>, Christian Yarleque <sup>6</sup> and Carlos M. Souza, Jr. <sup>7</sup>

<sup>1</sup> Instituto del Bien Común (IBC), Lima 15072, Peru; 100078614@cientifica.edu.pe (N.M.);

kathrin\_hopfgartner@hotmail.com (K.H.)

<sup>2</sup> Programa de Doctorado en Recursos Hídricos (PDRH), Universidad Nacional Agraria La Molina, Lima 15024, Peru; respinoza@lamolina.edu.pe (R.E.-V.); almeida@dsr.inpe.br (C.A.)

<sup>3</sup> Fundación EcoCiencia, Quito 170517, Ecuador; maolgaborja@ecociencia.org

<sup>4</sup> Fundación Amigos de la Naturaleza (FAN), Santa Cruz 2241, Bolivia; rcamargo@fan-bo.org

<sup>5</sup> Earth Observation and Geoinformatics Division, National Institute for Space Research, São José dos Campos 12227-010, Brazil

<sup>6</sup> Subdirección de Información y Análisis (SDIA), Instituto de Investigación en Glaciares y Ecosistemas de Montaña (INAIGEM), Ancash 02001, Peru; cyarleque@inaigem.gob.pe

<sup>7</sup> Instituto do Homem e Meio Ambiente da Amazônia (Imazon), Belem 66055-200, Brazil; souzajr@amazon.org.br

\* Correspondence: eturpo@lamolina.edu.pe; Tel.: +51-9105-05165

**Table S1.** Number of images per sensor and year in the study area.

| Year | All Available Images |      |     | Cloud Cover less than or equal to 70% |      |     |
|------|----------------------|------|-----|---------------------------------------|------|-----|
|      | TM                   | ETM+ | OLI | TM                                    | ETM+ | OLI |
| 1985 | 95                   |      |     | 90                                    |      |     |
| 1986 | 454                  |      |     | 420                                   |      |     |
| 1987 | 335                  |      |     | 313                                   |      |     |
| 1988 | 510                  |      |     | 496                                   |      |     |
| 1989 | 417                  |      |     | 402                                   |      |     |
| 1990 | 549                  |      |     | 510                                   |      |     |
| 1991 | 753                  |      |     | 689                                   |      |     |
| 1992 | 454                  |      |     | 446                                   |      |     |
| 1993 | 521                  |      |     | 496                                   |      |     |
| 1994 | 377                  |      |     | 362                                   |      |     |
| 1995 | 436                  |      |     | 425                                   |      |     |
| 1996 | 667                  |      |     | 631                                   |      |     |
| 1997 | 490                  |      |     | 456                                   |      |     |
| 1998 | 691                  |      |     | 633                                   |      |     |
| 1999 | 664                  | 346  |     | 607                                   | 296  |     |
| 2000 | 612                  | 739  |     | 555                                   | 650  |     |
| 2001 | 608                  | 829  |     | 576                                   | 751  |     |
| 2002 | 109                  | 778  |     | 98                                    | 679  |     |
| 2003 | 328                  | 578  |     | 313                                   | 508  |     |
| 2004 | 661                  | 796  |     | 613                                   | 717  |     |
| 2005 | 607                  | 820  |     | 573                                   | 739  |     |
| 2006 | 588                  | 734  |     | 551                                   | 655  |     |
| 2007 | 518                  | 635  |     | 499                                   | 572  |     |
| 2008 | 536                  | 786  |     | 502                                   | 732  |     |
| 2009 | 596                  | 814  |     | 576                                   | 736  |     |

|      |     |     |      |     |     |
|------|-----|-----|------|-----|-----|
| 2010 | 421 | 735 | 409  | 664 |     |
| 2011 | 376 | 749 | 355  | 659 |     |
| 2012 |     | 848 |      | 741 |     |
| 2013 |     | 747 | 656  | 667 | 548 |
| 2014 |     | 884 | 940  | 791 | 801 |
| 2015 |     | 890 | 994  | 800 | 828 |
| 2016 |     | 903 | 1003 | 829 | 880 |
| 2017 |     | 869 | 965  | 769 | 798 |
| 2018 |     | 906 | 963  | 800 | 811 |
| 2019 |     | 882 | 959  | 796 | 814 |
| 2020 |     | 932 | 974  | 857 | 843 |

**Table S2.** Access to multiannual classification products and glacier loss maps.

| Collections               | Asset ID in Google Earth Engine                                                              |
|---------------------------|----------------------------------------------------------------------------------------------|
| Classification 1985–2020  | <i>users/eturpo/Glacier-Mapping/COLECCION1/INTEGRACION/Glacier_collection1_integration_4</i> |
| Glacier Retreat 1990–2020 | <i>users/eturpo/Glacier-Mapping/PRODUCTS/Glacier_Retreat-1990-2020-5</i>                     |

**Table S3.** Results of glacier surface coverage in the TAGs by country.

| Year | Peru    | Bolivia | Ecuador | Colombia | Chile | Argentina | Venezuela | Total   |
|------|---------|---------|---------|----------|-------|-----------|-----------|---------|
| 1990 | 1743.45 | 499.58  | 86.10   | 77.21    | 20.77 | 1.15      | 1.12      | 2429.38 |
| 1991 | 1710.24 | 486.31  | 77.55   | 69.42    | 19.48 | 1.05      | 0.76      | 2364.80 |
| 1992 | 1676.98 | 478.88  | 77.55   | 69.42    | 18.82 | 1.00      | 0.76      | 2323.41 |
| 1993 | 1666.18 | 476.36  | 77.55   | 69.29    | 18.56 | 0.97      | 0.76      | 2309.67 |
| 1994 | 1646.19 | 471.23  | 77.55   | 69.16    | 17.46 | 0.90      | 0.76      | 2283.24 |
| 1995 | 1592.74 | 461.08  | 77.55   | 69.15    | 16.55 | 0.76      | 0.76      | 2218.58 |
| 1996 | 1575.81 | 457.24  | 76.93   | 67.73    | 16.30 | 0.75      | 0.75      | 2195.50 |
| 1997 | 1558.89 | 453.22  | 76.34   | 63.99    | 16.25 | 0.75      | 0.65      | 2170.08 |
| 1998 | 1529.94 | 445.85  | 75.04   | 62.49    | 16.03 | 0.74      | 0.48      | 2130.57 |
| 1999 | 1522.55 | 443.61  | 74.80   | 60.31    | 15.98 | 0.74      | 0.45      | 2118.44 |
| 2000 | 1503.67 | 434.75  | 73.70   | 60.18    | 15.73 | 0.73      | 0.44      | 2089.20 |
| 2001 | 1492.44 | 428.73  | 72.09   | 59.35    | 15.65 | 0.73      | 0.43      | 2069.41 |
| 2002 | 1487.04 | 427.45  | 71.63   | 55.98    | 15.47 | 0.72      | 0.35      | 2058.63 |
| 2003 | 1445.10 | 407.81  | 71.12   | 54.95    | 14.42 | 0.72      | 0.29      | 1994.41 |
| 2004 | 1419.82 | 398.14  | 70.23   | 53.86    | 14.10 | 0.71      | 0.26      | 1957.13 |
| 2005 | 1388.17 | 387.42  | 69.94   | 52.91    | 13.40 | 0.70      | 0.24      | 1912.78 |
| 2006 | 1378.18 | 383.84  | 69.35   | 52.22    | 13.33 | 0.69      | 0.21      | 1897.83 |
| 2007 | 1367.23 | 380.38  | 69.22   | 51.20    | 13.11 | 0.69      | 0.19      | 1882.01 |
| 2008 | 1352.38 | 375.00  | 69.06   | 50.59    | 12.63 | 0.69      | 0.19      | 1860.53 |
| 2009 | 1334.18 | 369.32  | 68.74   | 49.85    | 12.51 | 0.68      | 0.16      | 1835.43 |
| 2010 | 1320.85 | 364.02  | 68.52   | 49.21    | 12.15 | 0.68      | 0.14      | 1815.57 |
| 2011 | 1315.88 | 362.24  | 68.16   | 48.67    | 12.07 | 0.68      | 0.13      | 1807.83 |
| 2012 | 1305.61 | 359.58  | 67.83   | 46.57    | 12.06 | 0.68      | 0.12      | 1792.45 |
| 2013 | 1289.90 | 350.90  | 66.91   | 45.67    | 11.78 | 0.68      | 0.11      | 1765.94 |
| 2014 | 1279.49 | 347.18  | 66.41   | 42.15    | 11.55 | 0.68      | 0.11      | 1747.55 |
| 2015 | 1258.80 | 344.04  | 64.58   | 40.93    | 11.48 | 0.68      | 0.09      | 1720.59 |
| 2016 | 1210.19 | 329.60  | 62.79   | 38.41    | 11.24 | 0.68      | 0.07      | 1652.97 |
| 2017 | 1196.89 | 326.97  | 60.44   | 37.41    | 11.19 | 0.67      | 0.06      | 1633.64 |
| 2018 | 1178.61 | 323.56  | 59.95   | 36.82    | 11.16 | 0.67      | 0.06      | 1610.83 |
| 2019 | 1142.10 | 314.32  | 59.37   | 35.00    | 11.12 | 0.67      | 0.05      | 1562.63 |
| 2020 | 1025.29 | 286.69  | 54.78   | 30.73    | 10.96 | 0.63      | 0.03      | 1409.12 |

**Table S4.** Results of glacier surface coverage (km<sup>2</sup>) in the TAGs at different geographic latitudes.

| Year | Latitudes    |              |              |              |            |       |
|------|--------------|--------------|--------------|--------------|------------|-------|
|      | −24° to −20° | −19° to −15° | −14° to −10° | −09° to −00° | 01° to 11° |       |
| 1990 |              | 6.24         | 438.11       | 1195.23      | 692.39     | 97.42 |
| 1991 |              | 5.40         | 423.92       | 1172.02      | 676.01     | 87.44 |
| 1992 |              | 5.05         | 415.22       | 1147.60      | 668.11     | 87.44 |
| 1993 |              | 4.87         | 412.48       | 1138.35      | 666.65     | 87.31 |
| 1994 |              | 4.20         | 407.26       | 1123.64      | 660.97     | 87.18 |
| 1995 |              | 3.70         | 399.67       | 1076.91      | 651.14     | 87.17 |
| 1996 |              | 3.52         | 396.38       | 1061.12      | 648.74     | 85.73 |
| 1997 |              | 3.47         | 393.45       | 1047.64      | 643.71     | 81.81 |
| 1998 |              | 3.34         | 388.07       | 1020.53      | 638.75     | 79.88 |
| 1999 |              | 3.32         | 386.29       | 1014.06      | 637.15     | 77.62 |
| 2000 |              | 3.27         | 379.84       | 995.77       | 632.87     | 77.45 |
| 2001 |              | 3.24         | 374.20       | 987.38       | 628.11     | 76.48 |
| 2002 |              | 3.22         | 371.71       | 983.22       | 627.53     | 72.96 |
| 2003 |              | 2.98         | 354.36       | 954.86       | 610.37     | 71.84 |
| 2004 |              | 2.92         | 346.69       | 931.26       | 605.60     | 70.65 |
| 2005 |              | 2.83         | 338.38       | 900.31       | 601.62     | 69.64 |
| 2006 |              | 2.81         | 335.67       | 891.18       | 599.39     | 68.78 |
| 2007 |              | 2.79         | 333.52       | 880.40       | 597.58     | 67.72 |
| 2008 |              | 2.73         | 328.57       | 865.28       | 596.86     | 67.08 |
| 2009 |              | 2.68         | 325.02       | 846.03       | 595.48     | 66.21 |
| 2010 |              | 2.63         | 320.64       | 834.17       | 592.65     | 65.49 |
| 2011 |              | 2.63         | 319.35       | 829.25       | 591.72     | 64.89 |
| 2012 |              | 2.62         | 317.40       | 822.49       | 587.18     | 62.75 |
| 2013 |              | 2.58         | 311.26       | 806.69       | 583.81     | 61.60 |
| 2014 |              | 2.56         | 307.96       | 797.49       | 581.56     | 57.99 |
| 2015 |              | 2.56         | 305.74       | 783.61       | 572.22     | 56.45 |
| 2016 |              | 2.54         | 291.48       | 747.86       | 557.37     | 53.71 |
| 2017 |              | 2.52         | 289.08       | 738.84       | 550.77     | 52.43 |
| 2018 |              | 2.51         | 285.14       | 729.56       | 542.06     | 51.56 |
| 2019 |              | 2.50         | 278.33       | 701.39       | 530.79     | 49.62 |
| 2020 |              | 2.34         | 258.07       | 630.64       | 473.51     | 44.55 |

**Table S5.** Results of glacier surface coverage (km<sup>2</sup>) in the TAGs at different geographic longitudes.

| Year | Longitude    |              |              |              |              |              |
|------|--------------|--------------|--------------|--------------|--------------|--------------|
|      | −78° to −77° | −76° to −75° | −74° to −73° | −72° to −71° | −70° to −69° | −68° to −67° |
| 1990 | 715.14       | 284.70       | 54.74        | 531.51       | 505.27       | 338.02       |
| 1991 | 696.65       | 273.98       | 51.87        | 519.23       | 497.24       | 325.83       |
| 1992 | 688.65       | 268.63       | 51.06        | 510.34       | 484.36       | 320.37       |
| 1993 | 687.17       | 266.60       | 50.50        | 506.04       | 481.18       | 318.19       |
| 1994 | 681.39       | 262.57       | 49.28        | 500.24       | 476.08       | 313.69       |
| 1995 | 671.34       | 254.01       | 47.93        | 484.92       | 453.03       | 307.37       |
| 1996 | 668.90       | 249.22       | 46.86        | 479.91       | 446.17       | 304.45       |
| 1997 | 663.70       | 245.98       | 45.10        | 473.21       | 440.17       | 301.92       |
| 1998 | 658.42       | 241.85       | 43.69        | 460.92       | 428.44       | 297.27       |
| 1999 | 656.73       | 238.67       | 43.17        | 457.76       | 426.28       | 295.83       |
| 2000 | 652.37       | 236.33       | 42.37        | 451.59       | 416.49       | 290.05       |
| 2001 | 647.47       | 233.88       | 41.42        | 448.46       | 413.25       | 284.94       |
| 2002 | 646.78       | 228.98       | 41.30        | 445.09       | 412.83       | 283.65       |
| 2003 | 629.32       | 220.90       | 40.25        | 436.28       | 399.02       | 268.63       |
| 2004 | 624.39       | 216.50       | 39.30        | 426.38       | 388.49       | 262.07       |
| 2005 | 620.32       | 211.33       | 37.52        | 413.23       | 375.09       | 255.28       |
| 2006 | 617.93       | 209.61       | 36.93        | 408.87       | 371.46       | 253.01       |

|      |        |        |       |        |        |        |
|------|--------|--------|-------|--------|--------|--------|
| 2007 | 616.09 | 207.60 | 36.10 | 404.37 | 366.42 | 251.43 |
| 2008 | 615.32 | 206.09 | 35.85 | 398.23 | 356.59 | 248.45 |
| 2009 | 613.83 | 204.22 | 35.17 | 391.56 | 345.40 | 245.25 |
| 2010 | 610.89 | 201.89 | 34.20 | 387.31 | 339.00 | 242.28 |
| 2011 | 609.91 | 200.97 | 34.04 | 385.25 | 336.39 | 241.26 |
| 2012 | 605.26 | 198.08 | 33.22 | 382.66 | 333.45 | 239.78 |
| 2013 | 601.60 | 195.18 | 32.10 | 377.15 | 324.69 | 235.20 |
| 2014 | 599.23 | 191.41 | 31.10 | 372.46 | 320.27 | 233.08 |
| 2015 | 589.48 | 187.72 | 30.24 | 367.66 | 314.09 | 231.41 |
| 2016 | 574.28 | 180.74 | 28.06 | 349.12 | 299.75 | 221.02 |
| 2017 | 567.38 | 177.80 | 27.46 | 345.26 | 296.30 | 219.44 |
| 2018 | 558.30 | 174.85 | 26.58 | 340.60 | 293.57 | 216.93 |
| 2019 | 546.84 | 167.24 | 24.77 | 328.96 | 283.61 | 211.21 |
| 2020 | 488.61 | 140.47 | 21.93 | 305.24 | 258.98 | 193.89 |

Table S6. Results of glacier surface coverage (km<sup>2</sup>) in the TAGs by aspect.

| Year | North  | East   | South  | West   | Sum     |
|------|--------|--------|--------|--------|---------|
| 1990 | 480.27 | 511.76 | 754.99 | 682.31 | 2429.38 |
| 1991 | 466.99 | 496.17 | 735.37 | 666.22 | 2364.80 |
| 1992 | 457.89 | 487.08 | 723.64 | 654.75 | 2323.41 |
| 1993 | 454.97 | 484.15 | 719.64 | 650.87 | 2309.67 |
| 1994 | 450.51 | 479.51 | 711.28 | 641.90 | 2283.24 |
| 1995 | 435.28 | 464.94 | 693.76 | 624.57 | 2218.58 |
| 1996 | 430.85 | 459.72 | 686.63 | 618.27 | 2195.50 |
| 1997 | 425.50 | 454.63 | 679.12 | 610.81 | 2170.08 |
| 1998 | 416.38 | 445.75 | 667.76 | 600.66 | 2130.57 |
| 1999 | 413.94 | 443.32 | 664.25 | 596.90 | 2118.44 |
| 2000 | 407.56 | 436.23 | 655.66 | 589.73 | 2089.20 |
| 2001 | 403.63 | 432.50 | 649.22 | 584.05 | 2069.41 |
| 2002 | 402.23 | 430.45 | 644.89 | 581.04 | 2058.63 |
| 2003 | 388.45 | 415.93 | 626.38 | 563.63 | 1994.41 |
| 2004 | 381.35 | 407.39 | 613.99 | 554.40 | 1957.13 |
| 2005 | 370.80 | 397.45 | 601.92 | 542.60 | 1912.78 |
| 2006 | 367.52 | 394.36 | 597.78 | 538.17 | 1897.83 |
| 2007 | 363.73 | 391.18 | 593.36 | 533.73 | 1882.01 |
| 2008 | 358.75 | 386.95 | 587.09 | 527.74 | 1860.53 |
| 2009 | 353.74 | 382.47 | 578.95 | 520.27 | 1835.43 |
| 2010 | 349.21 | 378.41 | 573.21 | 514.74 | 1815.57 |
| 2011 | 347.60 | 376.80 | 570.89 | 512.54 | 1807.83 |
| 2012 | 344.02 | 373.68 | 566.84 | 507.91 | 1792.45 |
| 2013 | 338.27 | 368.60 | 558.68 | 500.39 | 1765.94 |
| 2014 | 334.56 | 364.73 | 553.09 | 495.18 | 1747.55 |
| 2015 | 328.48 | 359.81 | 545.52 | 486.77 | 1720.59 |
| 2016 | 314.44 | 345.31 | 525.26 | 467.95 | 1652.97 |
| 2017 | 310.58 | 341.38 | 519.54 | 462.13 | 1633.64 |
| 2018 | 306.57 | 337.62 | 511.51 | 455.12 | 1610.83 |
| 2019 | 298.91 | 329.48 | 494.39 | 439.85 | 1562.63 |
| 2020 | 274.42 | 303.83 | 441.01 | 389.85 | 1409.12 |

Table S7. Results of glacier surface coverage (km<sup>2</sup>) in the TAGs on different slopes.

| Year | Slope (degrees) |         |         |         |         |         |         |         |         |
|------|-----------------|---------|---------|---------|---------|---------|---------|---------|---------|
|      | 0°–10°          | 11°–20° | 21°–30° | 31°–40° | 41°–50° | 51°–60° | 61°–70° | 71°–80° | 81°–90° |
| 1990 | 246.10          | 576.47  | 692.41  | 518.33  | 261.59  | 108.38  | 24.71   | 1.36    | 0.03    |
| 1991 | 241.50          | 562.41  | 672.51  | 503.77  | 254.23  | 105.19  | 23.87   | 1.29    | 0.03    |
| 1992 | 236.27          | 553.10  | 660.84  | 495.08  | 249.78  | 103.51  | 23.54   | 1.26    | 0.03    |

|      |        |        |        |        |        |        |       |      |      |
|------|--------|--------|--------|--------|--------|--------|-------|------|------|
| 1993 | 234.81 | 549.78 | 656.96 | 492.21 | 248.33 | 102.86 | 23.44 | 1.25 | 0.03 |
| 1994 | 233.03 | 544.59 | 649.47 | 485.83 | 244.74 | 101.27 | 23.06 | 1.23 | 0.03 |
| 1995 | 227.12 | 529.75 | 630.19 | 471.68 | 237.60 | 98.50  | 22.52 | 1.20 | 0.02 |
| 1996 | 224.95 | 523.71 | 623.06 | 467.04 | 235.41 | 97.74  | 22.37 | 1.19 | 0.02 |
| 1997 | 222.80 | 517.29 | 615.33 | 461.59 | 232.85 | 96.83  | 22.19 | 1.18 | 0.02 |
| 1998 | 218.76 | 506.45 | 602.86 | 453.64 | 229.70 | 95.96  | 22.01 | 1.17 | 0.02 |
| 1999 | 217.52 | 503.30 | 599.07 | 451.20 | 228.65 | 95.58  | 21.94 | 1.16 | 0.02 |
| 2000 | 214.98 | 495.89 | 589.92 | 444.90 | 225.88 | 94.67  | 21.79 | 1.15 | 0.02 |
| 2001 | 213.32 | 490.86 | 583.97 | 440.71 | 223.80 | 93.95  | 21.64 | 1.14 | 0.02 |
| 2002 | 212.28 | 487.68 | 580.26 | 438.71 | 223.15 | 93.79  | 21.61 | 1.14 | 0.02 |
| 2003 | 207.57 | 472.15 | 560.09 | 423.83 | 216.59 | 91.76  | 21.28 | 1.12 | 0.02 |
| 2004 | 204.78 | 463.33 | 548.64 | 415.05 | 212.60 | 90.54  | 21.08 | 1.10 | 0.02 |
| 2005 | 201.56 | 453.09 | 535.24 | 404.57 | 207.51 | 88.90  | 20.80 | 1.08 | 0.02 |
| 2006 | 200.30 | 449.43 | 530.59 | 401.17 | 206.05 | 88.47  | 20.71 | 1.08 | 0.02 |
| 2007 | 199.09 | 445.85 | 525.66 | 397.32 | 204.38 | 88.00  | 20.62 | 1.07 | 0.02 |
| 2008 | 197.06 | 439.85 | 518.88 | 392.94 | 202.66 | 87.51  | 20.54 | 1.06 | 0.02 |
| 2009 | 194.46 | 432.99 | 511.32 | 387.78 | 200.50 | 86.88  | 20.42 | 1.06 | 0.02 |
| 2010 | 192.66 | 427.83 | 505.06 | 383.47 | 198.78 | 86.39  | 20.33 | 1.05 | 0.02 |
| 2011 | 191.92 | 425.91 | 502.73 | 381.82 | 197.99 | 86.12  | 20.29 | 1.05 | 0.02 |
| 2012 | 190.47 | 422.04 | 498.02 | 378.52 | 196.51 | 85.64  | 20.19 | 1.04 | 0.02 |
| 2013 | 187.79 | 415.16 | 490.18 | 372.92 | 193.97 | 84.81  | 20.04 | 1.03 | 0.02 |
| 2014 | 185.90 | 410.25 | 484.63 | 369.12 | 192.34 | 84.34  | 19.94 | 1.02 | 0.02 |
| 2015 | 183.83 | 404.61 | 476.78 | 362.43 | 189.11 | 83.15  | 19.65 | 1.01 | 0.02 |
| 2016 | 179.06 | 391.07 | 457.17 | 345.66 | 180.17 | 79.87  | 18.99 | 0.96 | 0.02 |
| 2017 | 177.26 | 386.76 | 451.84 | 341.35 | 177.84 | 78.86  | 18.75 | 0.95 | 0.02 |
| 2018 | 175.78 | 382.37 | 445.56 | 335.59 | 174.64 | 77.51  | 18.42 | 0.94 | 0.02 |
| 2019 | 172.57 | 373.69 | 433.86 | 324.22 | 166.94 | 73.11  | 17.29 | 0.92 | 0.02 |
| 2020 | 163.17 | 348.12 | 396.63 | 288.25 | 140.93 | 58.01  | 13.25 | 0.74 | 0.02 |

Table S8. Results of glacier surface coverage (km<sup>2</sup>) in the TAGs at different altitudes.

| Year | Altitude (masl) |           |           |           |           |           |           |           |                   |
|------|-----------------|-----------|-----------|-----------|-----------|-----------|-----------|-----------|-------------------|
|      | less than 4600  | 4601–4800 | 4801–5000 | 5001–5200 | 5201–5400 | 5401–5600 | 5601–5800 | 5801–6000 | greater than 6000 |
| 1990 | 21.22           | 134.84    | 421.36    | 658.63    | 599.69    | 328.77    | 140.55    | 72.87     | 51.44             |
| 1991 | 15.49           | 121.97    | 404.13    | 644.44    | 591.42    | 325.50    | 138.92    | 71.84     | 51.09             |
| 1992 | 14.78           | 117.29    | 394.20    | 634.46    | 580.42    | 322.97    | 137.45    | 71.04     | 50.80             |
| 1993 | 14.29           | 114.88    | 390.16    | 630.97    | 578.44    | 322.36    | 137.12    | 70.76     | 50.70             |
| 1994 | 13.70           | 110.02    | 381.83    | 624.61    | 575.21    | 321.00    | 136.16    | 70.31     | 50.40             |
| 1995 | 13.09           | 103.14    | 363.52    | 605.22    | 561.49    | 317.20    | 134.89    | 69.81     | 50.22             |
| 1996 | 11.96           | 99.29     | 356.03    | 598.70    | 558.52    | 316.58    | 134.59    | 69.67     | 50.15             |
| 1997 | 10.66           | 94.00     | 347.61    | 591.76    | 555.76    | 316.09    | 134.45    | 69.64     | 50.12             |
| 1998 | 9.18            | 86.73     | 334.54    | 580.16    | 551.07    | 315.11    | 134.14    | 69.56     | 50.08             |
| 1999 | 8.52            | 84.21     | 331.20    | 576.69    | 549.39    | 314.80    | 134.04    | 69.52     | 50.07             |
| 2000 | 8.15            | 81.08     | 322.35    | 567.27    | 543.98    | 313.37    | 133.55    | 69.42     | 50.03             |
| 2001 | 7.67            | 77.84     | 315.99    | 561.19    | 541.33    | 312.76    | 133.22    | 69.38     | 50.02             |
| 2002 | 7.29            | 75.14     | 312.97    | 558.82    | 540.21    | 312.27    | 132.68    | 69.24     | 50.01             |
| 2003 | 6.98            | 69.23     | 291.42    | 537.09    | 530.12    | 309.70    | 131.23    | 68.72     | 49.92             |
| 2004 | 6.55            | 65.13     | 280.25    | 524.93    | 523.22    | 308.17    | 130.60    | 68.41     | 49.88             |
| 2005 | 6.33            | 60.70     | 267.61    | 511.38    | 514.39    | 305.44    | 129.35    | 67.91     | 49.68             |
| 2006 | 6.05            | 58.30     | 262.70    | 507.11    | 512.10    | 304.96    | 129.12    | 67.84     | 49.65             |
| 2007 | 5.80            | 56.15     | 257.38    | 502.19    | 509.80    | 304.38    | 128.94    | 67.77     | 49.60             |
| 2008 | 5.50            | 54.71     | 252.27    | 494.30    | 505.52    | 303.23    | 128.19    | 67.37     | 49.46             |
| 2009 | 5.33            | 52.51     | 245.49    | 485.16    | 500.09    | 302.19    | 127.93    | 67.29     | 49.43             |
| 2010 | 5.17            | 51.03     | 239.86    | 478.21    | 496.64    | 301.17    | 127.18    | 66.94     | 49.38             |
| 2011 | 4.97            | 49.98     | 237.90    | 475.83    | 495.16    | 300.79    | 127.00    | 66.87     | 49.34             |
| 2012 | 4.72            | 47.98     | 232.92    | 470.68    | 492.93    | 300.28    | 126.81    | 66.79     | 49.33             |
| 2013 | 4.32            | 46.68     | 226.34    | 460.62    | 487.37    | 298.76    | 126.04    | 66.51     | 49.31             |
| 2014 | 4.07            | 44.59     | 220.57    | 455.01    | 484.39    | 297.86    | 125.51    | 66.30     | 49.26             |
| 2015 | 3.72            | 42.76     | 213.85    | 445.45    | 478.43    | 296.23    | 124.90    | 66.06     | 49.20             |

|      |      |       |        |        |        |        |        |       |       |
|------|------|-------|--------|--------|--------|--------|--------|-------|-------|
| 2016 | 2.91 | 37.50 | 196.36 | 424.31 | 463.91 | 291.71 | 123.24 | 64.86 | 48.17 |
| 2017 | 2.48 | 34.69 | 191.39 | 419.07 | 460.24 | 290.64 | 122.57 | 64.55 | 47.98 |
| 2018 | 2.33 | 33.01 | 185.54 | 411.17 | 455.54 | 289.19 | 121.86 | 64.27 | 47.91 |
| 2019 | 2.21 | 30.14 | 174.94 | 394.75 | 442.91 | 285.50 | 120.66 | 63.71 | 47.81 |
| 2020 | 1.61 | 22.59 | 147.06 | 346.33 | 403.95 | 267.15 | 113.18 | 60.81 | 46.43 |

**Table S9.** Glacier surface coverage results in the TAGs by basin.

| Year | Area (km <sup>2</sup> ) |              | Area Loss (km <sup>2</sup> ) |              | Area Loss (%) |              |
|------|-------------------------|--------------|------------------------------|--------------|---------------|--------------|
|      | Other Basins            | Amazon Basin | Other Basins                 | Amazon Basin | Other Basins  | Amazon Basin |
| 1990 | 901.93                  | 1527.45      | 0.00                         | 0.00         | 0.00          | 0.00         |
| 1991 | 876.20                  | 1488.60      | −25.73                       | −38.85       | −2.85         | −2.54        |
| 1992 | 860.62                  | 1462.79      | −15.58                       | −25.81       | −4.58         | −4.23        |
| 1993 | 856.56                  | 1453.11      | −4.06                        | −9.68        | −5.03         | −4.87        |
| 1994 | 847.09                  | 1436.15      | −9.47                        | −16.96       | −6.08         | −5.98        |
| 1995 | 828.87                  | 1389.72      | −18.23                       | −46.43       | −8.10         | −9.02        |
| 1996 | 822.82                  | 1372.68      | −6.04                        | −17.04       | −8.77         | −10.13       |
| 1997 | 812.59                  | 1357.49      | −10.23                       | −15.19       | −9.91         | −11.13       |
| 1998 | 802.59                  | 1327.98      | −10.00                       | −29.51       | −11.01        | −13.06       |
| 1999 | 797.27                  | 1321.17      | −5.32                        | −6.81        | −11.60        | −13.50       |
| 2000 | 790.41                  | 1298.79      | −6.85                        | −22.38       | −12.36        | −14.97       |
| 2001 | 783.60                  | 1285.81      | −6.81                        | −12.98       | −13.12        | −15.82       |
| 2002 | 776.84                  | 1281.79      | −6.76                        | −4.02        | −13.87        | −16.08       |
| 2003 | 752.51                  | 1241.90      | −24.34                       | −39.89       | −16.57        | −18.69       |
| 2004 | 742.49                  | 1214.64      | −10.01                       | −27.26       | −17.68        | −20.48       |
| 2005 | 732.02                  | 1180.76      | −10.47                       | −33.88       | −18.84        | −22.70       |
| 2006 | 727.94                  | 1169.89      | −4.08                        | −10.87       | −19.29        | −23.41       |
| 2007 | 723.62                  | 1158.39      | −4.32                        | −11.50       | −19.77        | −24.16       |
| 2008 | 717.56                  | 1142.96      | −6.06                        | −15.42       | −20.44        | −25.17       |
| 2009 | 711.82                  | 1123.60      | −5.74                        | −19.36       | −21.08        | −26.44       |
| 2010 | 704.69                  | 1110.88      | −7.13                        | −12.72       | −21.87        | −27.27       |
| 2011 | 702.49                  | 1105.35      | −2.20                        | −5.54        | −22.11        | −27.63       |
| 2012 | 694.99                  | 1097.46      | −7.50                        | −7.89        | −22.94        | −28.15       |
| 2013 | 685.97                  | 1079.97      | −9.02                        | −17.49       | −23.94        | −29.30       |
| 2014 | 678.32                  | 1069.24      | −7.65                        | −10.73       | −24.79        | −30.00       |
| 2015 | 666.83                  | 1053.77      | −11.49                       | −15.47       | −26.07        | −31.01       |
| 2016 | 644.30                  | 1008.66      | −22.52                       | −45.10       | −28.56        | −33.96       |
| 2017 | 637.39                  | 996.24       | −6.91                        | −12.42       | −29.33        | −34.78       |
| 2018 | 625.80                  | 985.03       | −11.59                       | −11.22       | −30.62        | −35.51       |
| 2019 | 607.97                  | 954.66       | −17.83                       | −30.37       | −32.59        | −37.50       |
| 2020 | 539.53                  | 869.59       | −68.44                       | −85.07       | −40.18        | −43.07       |

**Table S10.** Validation results of the glacier cover classification without filters.

| Year | F1score | Accuracy | Kappa | Precision | Recall |
|------|---------|----------|-------|-----------|--------|
| 1985 | 91.13   | 94.04    | 86.64 | 93.69     | 88.70  |
| 1986 | 91.82   | 94.62    | 87.82 | 94.88     | 88.96  |
| 1987 | 92.11   | 95.05    | 88.51 | 95.47     | 88.97  |
| 1988 | 92.41   | 95.60    | 89.32 | 97.50     | 87.82  |
| 1989 | 93.24   | 95.89    | 90.29 | 95.23     | 91.34  |
| 1990 | 92.52   | 95.63    | 89.44 | 97.10     | 88.35  |
| 1991 | 91.79   | 95.38    | 88.59 | 96.50     | 87.52  |
| 1992 | 92.69   | 96.00    | 89.95 | 97.52     | 88.32  |
| 1993 | 93.24   | 96.15    | 90.55 | 95.63     | 90.97  |
| 1994 | 93.11   | 96.11    | 90.41 | 95.88     | 90.50  |
| 1995 | 91.68   | 95.57    | 88.68 | 98.40     | 85.82  |
| 1996 | 92.55   | 95.95    | 89.78 | 97.95     | 87.72  |
| 1997 | 92.86   | 96.08    | 90.17 | 96.59     | 89.41  |

|      |       |       |       |       |       |
|------|-------|-------|-------|-------|-------|
| 1998 | 85.41 | 93.01 | 80.91 | 98.13 | 75.61 |
| 1999 | 92.29 | 95.74 | 89.35 | 94.42 | 90.26 |
| 2000 | 92.83 | 96.09 | 90.15 | 94.25 | 91.46 |
| 2001 | 92.12 | 95.67 | 89.13 | 93.57 | 90.71 |
| 2002 | 76.87 | 89.39 | 70.03 | 72.08 | 82.34 |
| 2003 | 91.58 | 95.69 | 88.70 | 97.03 | 86.71 |
| 2004 | 90.73 | 95.31 | 87.61 | 97.58 | 84.77 |
| 2005 | 88.19 | 94.26 | 84.42 | 94.86 | 82.39 |
| 2006 | 91.35 | 95.75 | 88.55 | 97.30 | 86.09 |
| 2007 | 92.46 | 96.26 | 89.98 | 96.67 | 88.60 |
| 2008 | 89.80 | 94.91 | 86.42 | 94.31 | 85.71 |
| 2009 | 89.71 | 95.16 | 86.56 | 96.63 | 83.71 |
| 2010 | 87.53 | 94.48 | 84.03 | 96.89 | 79.83 |
| 2011 | 90.96 | 95.68 | 88.12 | 93.55 | 88.50 |
| 2012 | 91.57 | 95.81 | 88.78 | 92.24 | 90.90 |
| 2013 | 91.19 | 95.90 | 88.52 | 95.31 | 87.41 |
| 2014 | 91.05 | 96.01 | 88.50 | 96.76 | 85.99 |
| 2015 | 91.66 | 96.20 | 89.21 | 96.72 | 87.11 |
| 2016 | 86.04 | 94.43 | 82.62 | 97.60 | 76.93 |
| 2017 | 90.24 | 95.79 | 87.57 | 97.19 | 84.22 |
| 2018 | 90.44 | 95.77 | 87.73 | 94.19 | 86.98 |
| 2019 | 90.72 | 96.14 | 88.30 | 96.92 | 85.27 |
| 2020 | 86.74 | 94.91 | 83.64 | 97.08 | 78.39 |

Table S11. Validation results of the glacier cover classification with filters.

| Year | F1score | Accuracy | Kappa | Precision | Recall |
|------|---------|----------|-------|-----------|--------|
| 1985 | 92.27   | 94.46    | 87.96 | 94.41     | 90.23  |
| 1986 | 93.62   | 95.72    | 90.41 | 96.00     | 91.37  |
| 1987 | 93.75   | 96.06    | 90.88 | 97.05     | 90.66  |
| 1988 | 93.91   | 96.37    | 91.33 | 96.31     | 91.64  |
| 1989 | 93.84   | 96.26    | 91.16 | 96.79     | 91.05  |
| 1990 | 93.63   | 96.23    | 90.95 | 97.26     | 90.26  |
| 1991 | 93.35   | 96.22    | 90.71 | 96.81     | 90.13  |
| 1992 | 94.25   | 96.79    | 92.03 | 97.45     | 91.26  |
| 1993 | 94.16   | 96.68    | 91.85 | 98.01     | 90.59  |
| 1994 | 94.24   | 96.76    | 91.99 | 97.97     | 90.79  |
| 1995 | 93.99   | 96.72    | 91.74 | 98.44     | 89.93  |
| 1996 | 93.44   | 96.40    | 90.97 | 98.28     | 89.05  |
| 1997 | 93.95   | 96.68    | 91.68 | 98.45     | 89.85  |
| 1998 | 93.51   | 96.61    | 91.22 | 97.32     | 89.99  |
| 1999 | 93.23   | 96.34    | 90.73 | 97.81     | 89.06  |
| 2000 | 93.36   | 96.46    | 90.95 | 97.66     | 89.41  |
| 2001 | 93.37   | 96.45    | 90.95 | 98.19     | 89.00  |
| 2002 | 93.05   | 96.31    | 90.55 | 97.98     | 88.60  |
| 2003 | 93.45   | 96.64    | 91.19 | 98.01     | 89.30  |
| 2004 | 92.68   | 96.24    | 90.16 | 97.80     | 88.07  |
| 2005 | 92.67   | 96.37    | 90.26 | 97.96     | 87.92  |
| 2006 | 93.04   | 96.55    | 90.76 | 98.20     | 88.39  |
| 2007 | 92.67   | 96.39    | 90.28 | 98.02     | 87.86  |
| 2008 | 92.49   | 96.29    | 90.05 | 98.19     | 87.42  |
| 2009 | 92.51   | 96.41    | 90.16 | 97.93     | 87.66  |
| 2010 | 92.24   | 96.40    | 89.90 | 97.23     | 87.74  |
| 2011 | 92.76   | 96.59    | 90.53 | 97.35     | 88.58  |
| 2012 | 92.08   | 96.24    | 89.62 | 97.07     | 87.58  |
| 2013 | 92.49   | 96.52    | 90.24 | 97.59     | 87.90  |
| 2014 | 92.33   | 96.58    | 90.13 | 98.03     | 87.26  |

|      |       |       |       |       |       |
|------|-------|-------|-------|-------|-------|
| 2015 | 91.94 | 96.36 | 89.60 | 97.57 | 86.93 |
| 2016 | 91.30 | 96.35 | 89.00 | 97.18 | 86.09 |
| 2017 | 91.57 | 96.34 | 89.25 | 97.70 | 86.17 |
| 2018 | 91.41 | 96.29 | 89.06 | 97.60 | 85.97 |
| 2019 | 91.44 | 96.49 | 89.25 | 97.72 | 85.92 |
| 2020 | 87.06 | 95.08 | 84.08 | 98.65 | 77.91 |

**Table S12.** Validation metrics disregarding and considering area proportions.

| Year | Without Area Proportions |          |           |        | With Area Proportions |          |           |        |
|------|--------------------------|----------|-----------|--------|-----------------------|----------|-----------|--------|
|      | F1score                  | Accuracy | Precision | Recall | F1score               | Accuracy | Precision | Recall |
| 1985 | 92.27                    | 94.46    | 94.41     | 90.23  | 91.10                 | 94.41    | 92.13     | 90.10  |
| 1986 | 93.62                    | 95.72    | 96.00     | 91.37  | 91.50                 | 95.38    | 92.84     | 90.21  |
| 1987 | 93.75                    | 96.06    | 97.05     | 90.66  | 91.91                 | 95.77    | 94.42     | 89.53  |
| 1988 | 93.91                    | 96.37    | 96.31     | 91.64  | 92.18                 | 96.13    | 94.73     | 89.76  |
| 1989 | 93.84                    | 96.26    | 96.79     | 91.05  | 91.87                 | 95.83    | 95.30     | 88.68  |
| 1990 | 93.63                    | 96.23    | 97.26     | 90.26  | 91.85                 | 95.83    | 95.85     | 88.16  |
| 1991 | 93.35                    | 96.22    | 96.81     | 90.13  | 91.66                 | 95.94    | 95.30     | 88.29  |
| 1992 | 94.25                    | 96.79    | 97.45     | 91.26  | 92.83                 | 96.56    | 96.05     | 89.83  |
| 1993 | 94.16                    | 96.68    | 98.01     | 90.59  | 92.43                 | 96.22    | 96.61     | 88.60  |
| 1994 | 94.24                    | 96.76    | 97.97     | 90.79  | 92.56                 | 96.36    | 96.28     | 89.12  |
| 1995 | 93.99                    | 96.72    | 98.44     | 89.93  | 92.10                 | 96.15    | 96.81     | 87.82  |
| 1996 | 93.44                    | 96.40    | 98.28     | 89.05  | 91.51                 | 95.80    | 97.00     | 86.61  |
| 1997 | 93.95                    | 96.68    | 98.45     | 89.85  | 92.08                 | 96.08    | 97.23     | 87.44  |
| 1998 | 93.51                    | 96.61    | 97.32     | 89.99  | 91.42                 | 96.06    | 96.22     | 87.07  |
| 1999 | 93.23                    | 96.34    | 97.81     | 89.06  | 91.11                 | 95.73    | 96.55     | 86.25  |
| 2000 | 93.36                    | 96.46    | 97.66     | 89.41  | 91.29                 | 95.95    | 96.02     | 87.00  |
| 2001 | 93.37                    | 96.45    | 98.19     | 89.00  | 91.19                 | 95.80    | 96.58     | 86.38  |
| 2002 | 93.05                    | 96.31    | 97.98     | 88.60  | 90.77                 | 95.64    | 96.39     | 85.78  |
| 2003 | 93.45                    | 96.64    | 98.01     | 89.30  | 91.45                 | 96.10    | 96.54     | 86.86  |
| 2004 | 92.68                    | 96.24    | 97.80     | 88.07  | 90.50                 | 95.69    | 96.07     | 85.54  |
| 2005 | 92.67                    | 96.37    | 97.96     | 87.92  | 90.51                 | 95.79    | 96.56     | 85.17  |
| 2006 | 93.04                    | 96.55    | 98.20     | 88.39  | 91.00                 | 96.00    | 96.82     | 85.85  |
| 2007 | 92.67                    | 96.39    | 98.02     | 87.86  | 90.53                 | 95.84    | 96.39     | 85.35  |
| 2008 | 92.49                    | 96.29    | 98.19     | 87.42  | 90.69                 | 95.84    | 96.89     | 85.24  |
| 2009 | 92.51                    | 96.41    | 97.93     | 87.66  | 90.60                 | 95.97    | 96.41     | 85.45  |
| 2010 | 92.24                    | 96.40    | 97.23     | 87.74  | 90.18                 | 96.01    | 95.42     | 85.48  |
| 2011 | 92.76                    | 96.59    | 97.35     | 88.58  | 90.47                 | 96.07    | 95.75     | 85.74  |
| 2012 | 92.08                    | 96.24    | 97.07     | 87.58  | 89.95                 | 95.83    | 95.42     | 85.06  |
| 2013 | 92.49                    | 96.52    | 97.59     | 87.90  | 90.61                 | 96.16    | 95.99     | 85.79  |
| 2014 | 92.33                    | 96.58    | 98.03     | 87.26  | 90.50                 | 96.18    | 96.53     | 85.18  |
| 2015 | 91.94                    | 96.36    | 97.57     | 86.93  | 89.97                 | 96.02    | 95.37     | 85.15  |
| 2016 | 91.30                    | 96.35    | 97.18     | 86.09  | 89.35                 | 96.09    | 94.66     | 84.60  |
| 2017 | 91.57                    | 96.34    | 97.70     | 86.17  | 89.61                 | 96.03    | 95.32     | 84.53  |
| 2018 | 91.41                    | 96.29    | 97.60     | 85.97  | 89.24                 | 95.91    | 95.19     | 83.98  |
| 2019 | 91.44                    | 96.49    | 97.72     | 85.92  | 89.34                 | 96.14    | 95.16     | 84.20  |
| 2020 | 87.06                    | 95.08    | 98.65     | 77.91  | 86.12                 | 95.01    | 96.91     | 77.49  |
| Mean | 92.81                    | 96.32    | 97.56     | 88.54  | 90.89                 | 95.90    | 95.83     | 86.48  |



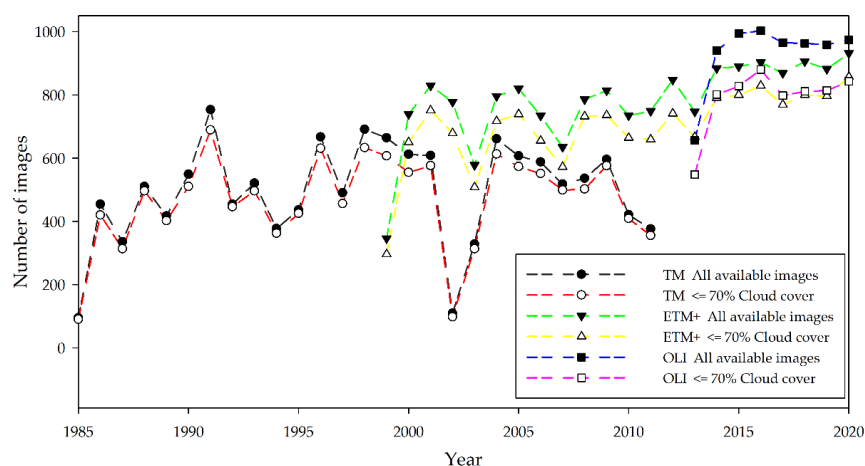

**Figure S1.** Number of images per sensor and year in the study area.

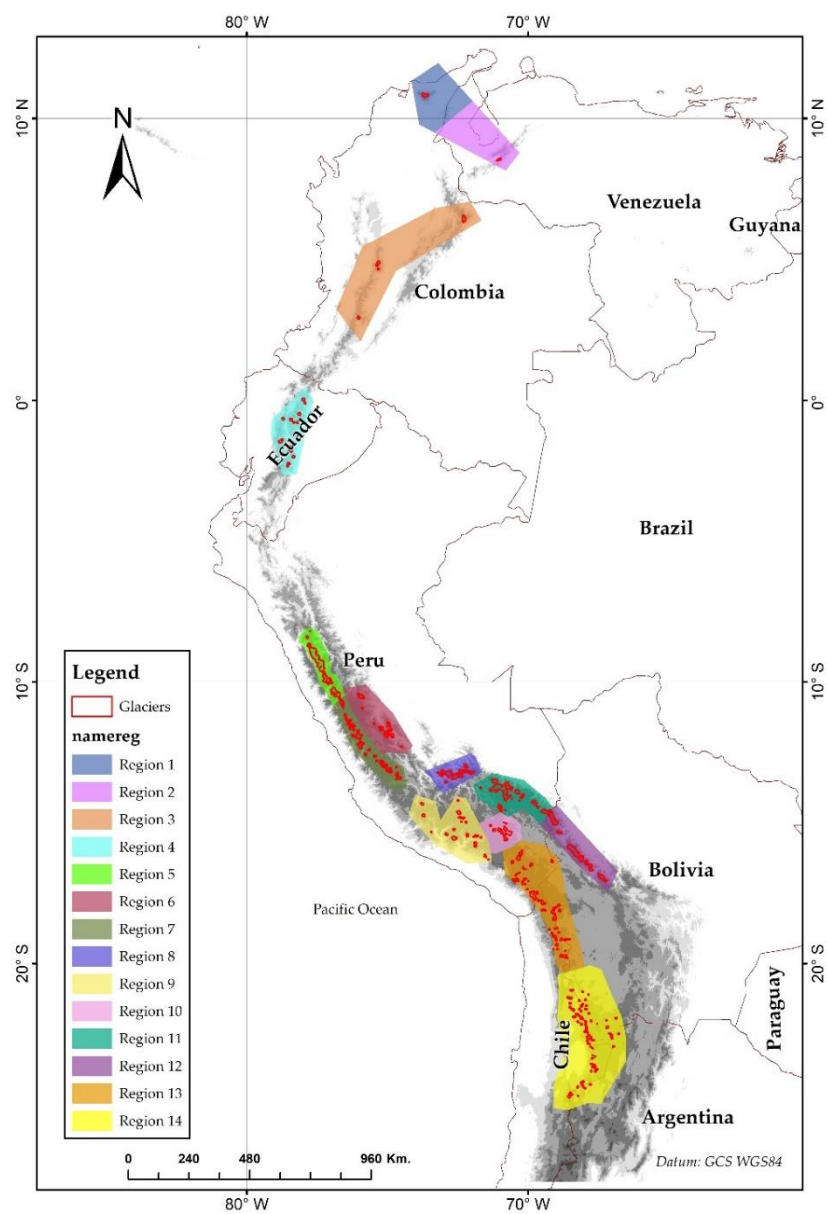

**Figure S2.** Benchmark glaciers and classification regions. The division of regions is based on the criteria of similar geoclimatic conditions.

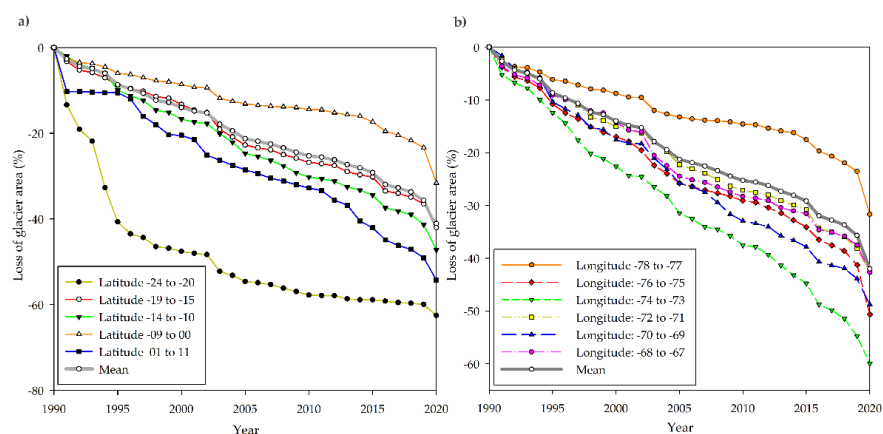

**Figure S3.** Evolution of annual glacier area coverage loss in the TAGs from 1987 to 2019: (a) loss at different latitudes and (b) loss at different longitudes.

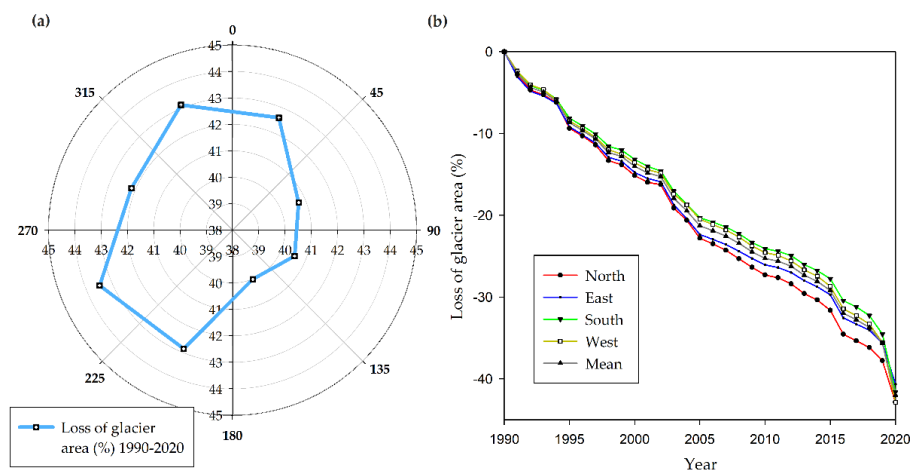

**Figure S4.** Evolution of annual glacier area coverage loss in the TAGs from 1990 to 2020 at different glacier slope orientations: (a) polar plot of glacier loss, and (b) change in annual glacier area loss.

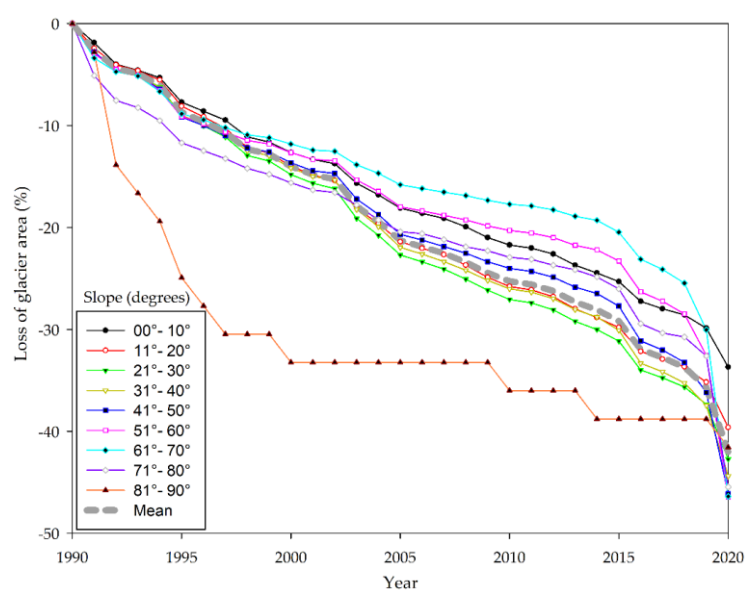

**Figure S5.** Loss of the annual glacier area coverage in the TAGs from 1990 to 2020 in different slope ranges.

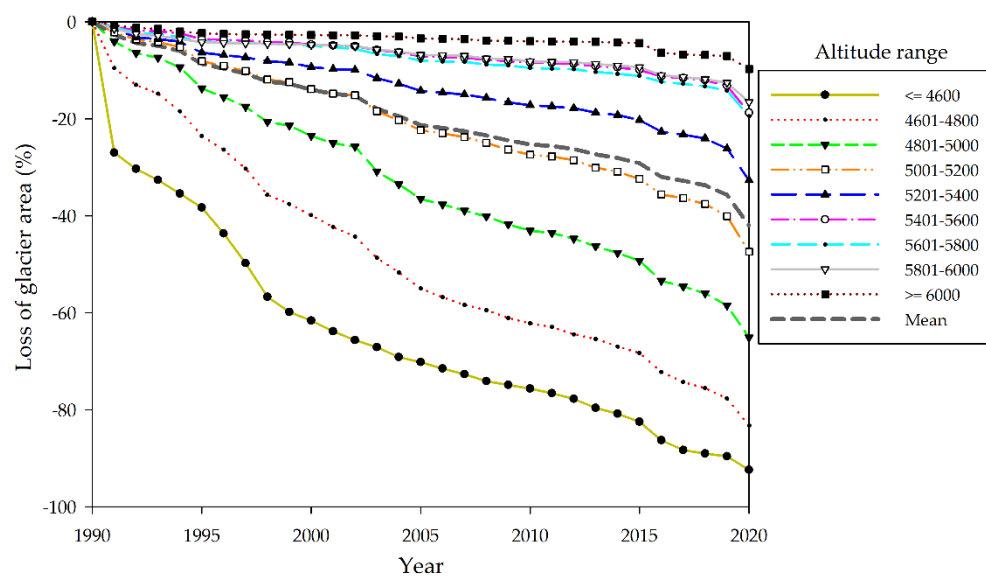

**Figure S6.** Annual glacier loss in the TAGs from 1990 to 2020 in different altitude ranges.

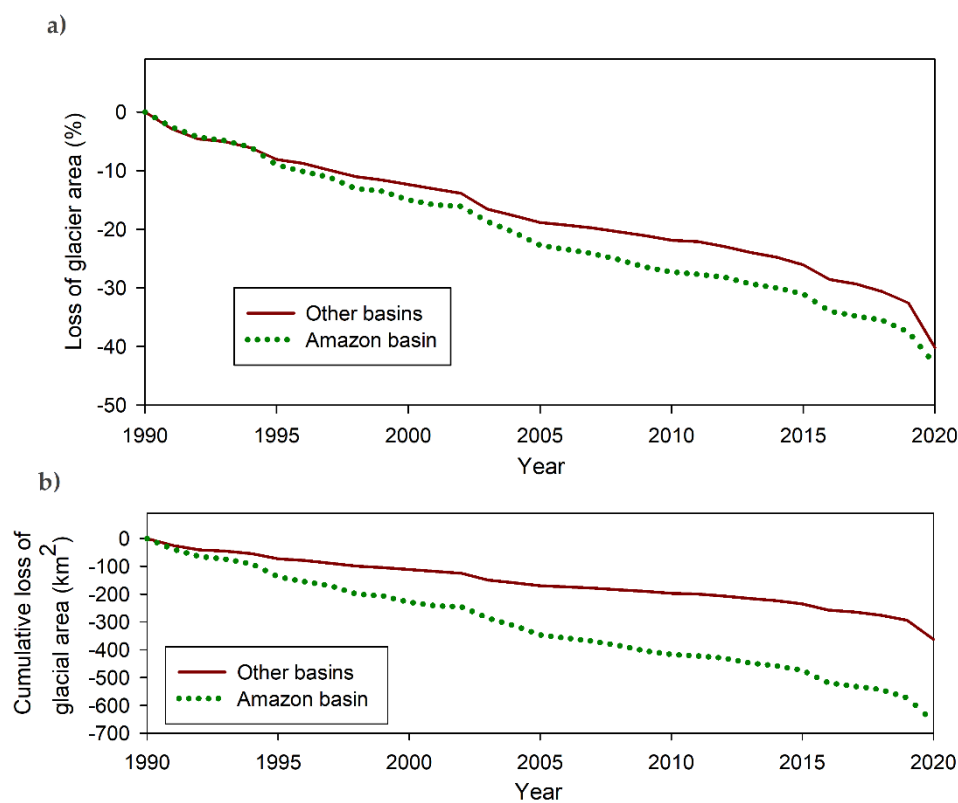

**Figure S7.** Evolution of the annual loss of glacier area in the TAGs from 1990 to 2020 by basins (a) percentage loss of glacier area and (b) cumulative loss of glacier area in km<sup>2</sup>.

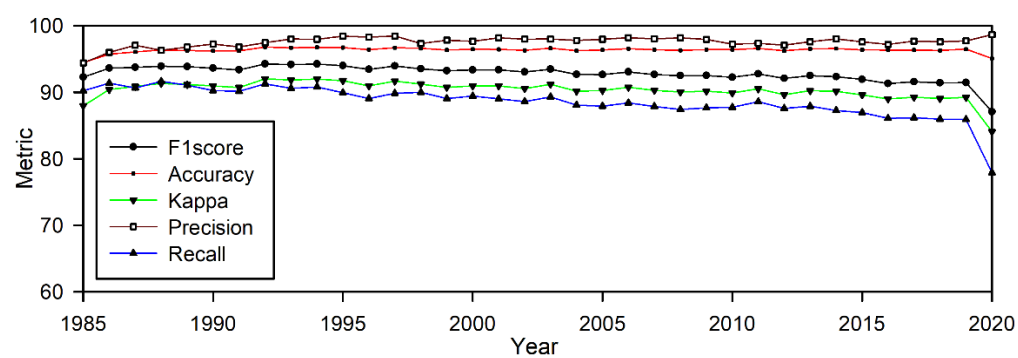

**Figure S8.** Multitemporal validation metrics for the final multiyear glacier cover maps.
